# Supplementary material for: An indoor light-activated 3D cone-shaped MoS2 bilayer-based NO gas sensor with PPb-level detection at room-temperature
Source: Royal Society of Chemistry journal article supplement (doi:10.1039/c8nr10157d), 2019-01-01
Supplement: c8nr10157d1.pdf [file c8nr10157d1.pdf]

## Supplementary Information

### Indoor Light-Activated Cone-Shaped MoS<sub>2</sub> Gas Sensor for

### Room-temperature ppb-level Detection on NO Gas

Yu-Ze Chen<sup>a, b</sup>, Sheng-Wen Wang<sup>c</sup>, Chun-Chuan Yang<sup>c</sup>, Chieh-Han Chung<sup>c</sup>, Yi-Chung Wang<sup>a, b</sup>, Sung-Wen Huang Chen<sup>c</sup>, Chia-Wei Chen<sup>a, b</sup>, Teng-Yu Su<sup>a, b</sup>, Heh-Nan Lin<sup>a</sup>, Hao-Chung Kuo<sup>c\*</sup>, and Yu-Lun Chueh<sup>a, b\*</sup>

<sup>a</sup>Department of Materials Science and Engineering, National Tsing Hua University, Hsinchu, 30013, Taiwan, ROC. E-mail: ylchueh@mx.nthu.edu.tw

<sup>b</sup>Frontier Research Center on Fundamental and Applied Sciences of Matters, National Tsing Hua University, Hsinchu 30013, Taiwan, ROC.

<sup>c</sup>Department of Photonics and Institute of Electro-Optical Engineering, National Chiao Tung University, Hsinchu 30010, Taiwan, ROC.

\*E-mail: hckuo@faculty.nctu.edu.tw and ylchueh@mx.nthu.edu.tw.

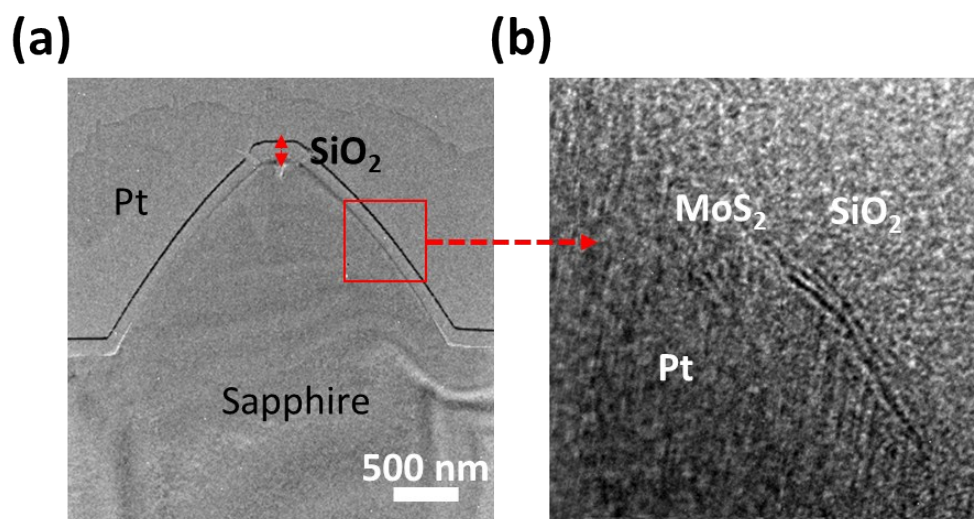

**Figure S1** (a) TEM images of MoS<sub>2</sub> grown on cone-shaped sapphire substrate. (b) Enlarged view of (a), confirming the discontinuity of monolayer MoS<sub>2</sub>.

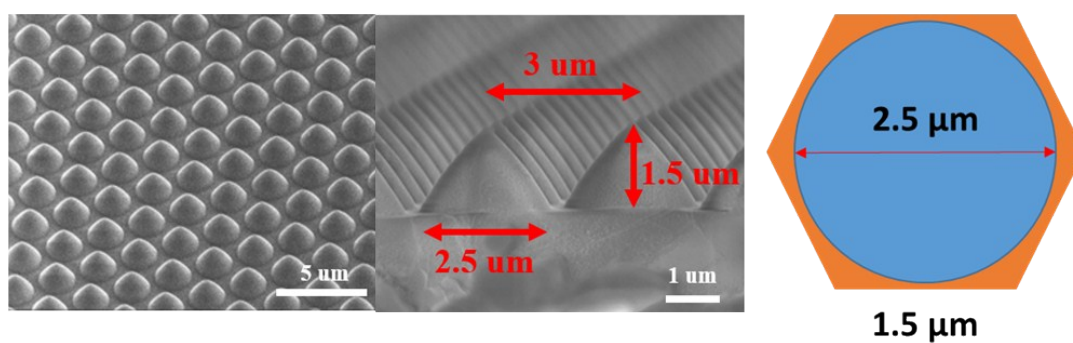

**Figure S2** SEM images of cones periodically arranged on sapphire with their corresponding size. Flat area of  $5.85 \mu\text{m}^2$  can be given by  $6 \times 1.5 \times 1.3 \times 0.5$  while surface area of  $7.64 \mu\text{m}^2$  per cone can be given by  $1.95 \times 1.95 \times \pi \times 0.64$ , yielding the ratio between flat area and surface area per cone being 1.3 by  $\frac{7.64}{5.85}$ .

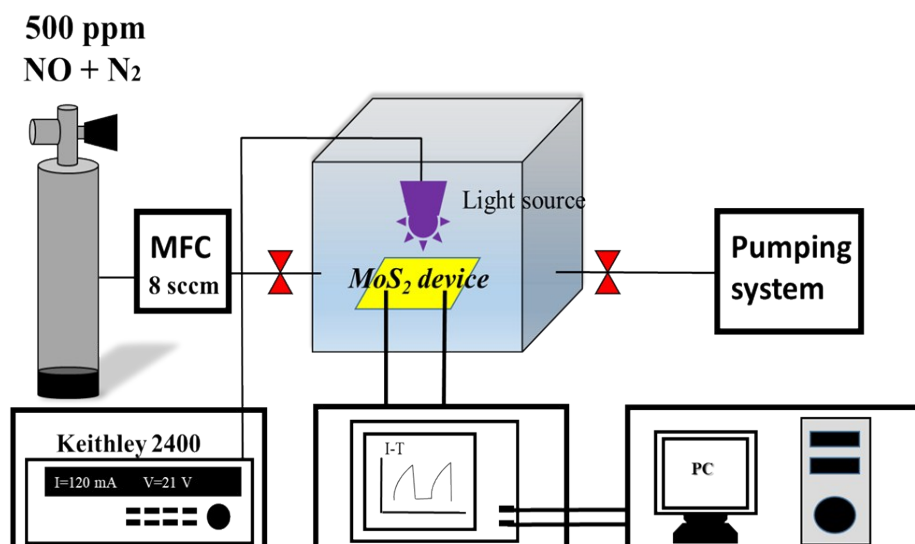

**Figure S3** Schematic of the hand-made gas sensor measurements including a chamber and a stage where the light source was installed and linked to a Keithley system. Mass flow controller (MFC) controls the concentrations of NO and N<sub>2</sub> gases.

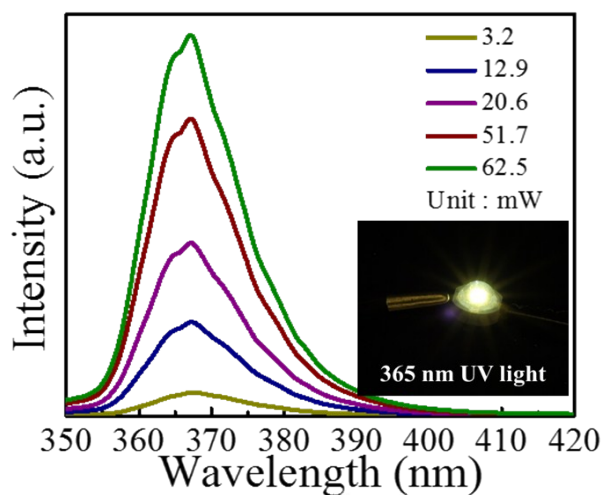

**Figure S4** The radiant flux of UV light with the wavelength of 365 nm as the functions of emitting powers.

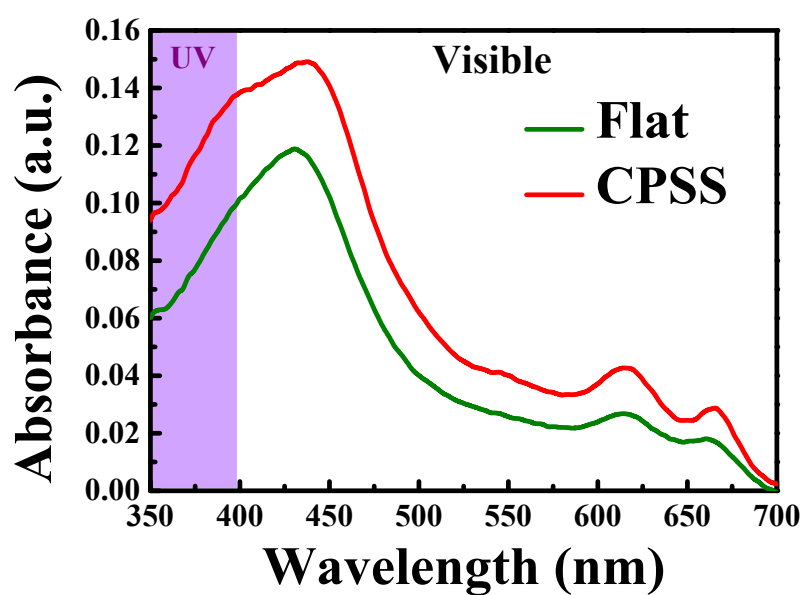

**Figure S5** UV-Vis absorption spectra of F-MoS<sub>2</sub> (green) and CS-MoS<sub>2</sub> (red).

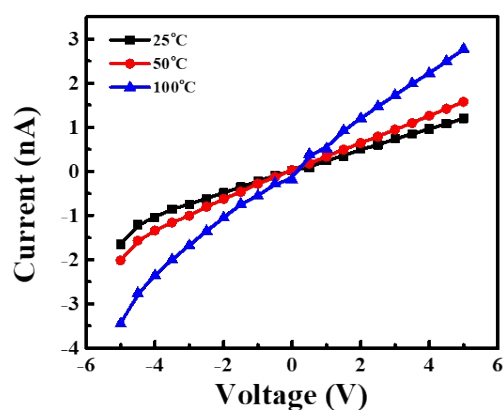

**Figure S6** I-V characteristics of F-MoS<sub>2</sub> GS measured at 25 (black), 50 (red) and 100 °C (blue), respectively. The conductance of MoS<sub>2</sub> bilayers increases as temperature increases, confirming a semiconductor property of MoS<sub>2</sub> bilayers.

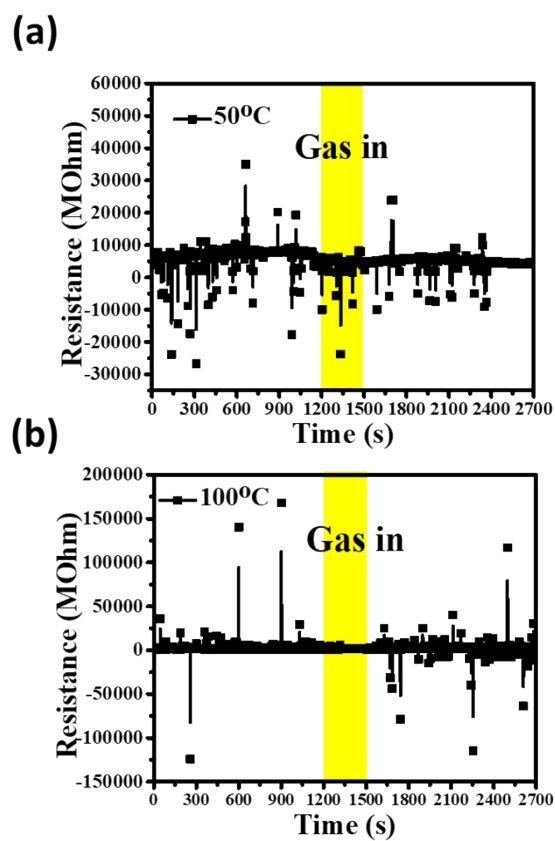

**Figure S7** 1ppm NO gas sensing measurements of F-MoS<sub>2</sub> GS at operating temperatures of (a) 50 °C, (b) 100 °C. The sluggish response was proved that our devices would not be promoted by heating.

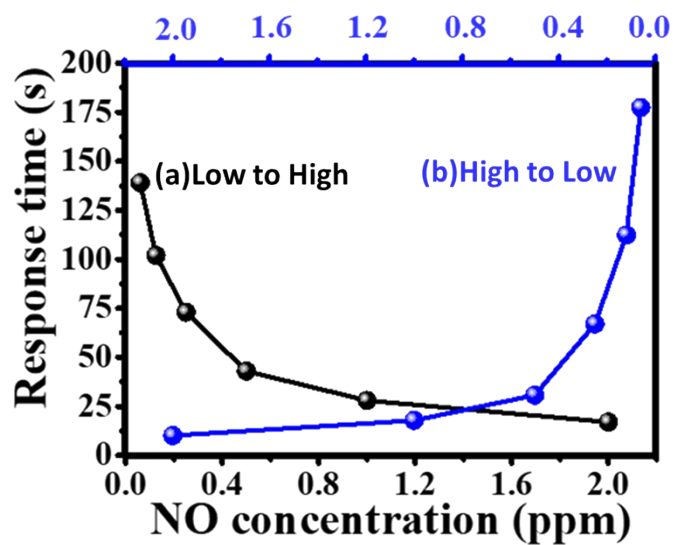

**Figure S8** A plot of response time as a dependence of NO concentration gradient from (a) low to high and (b) high to low.

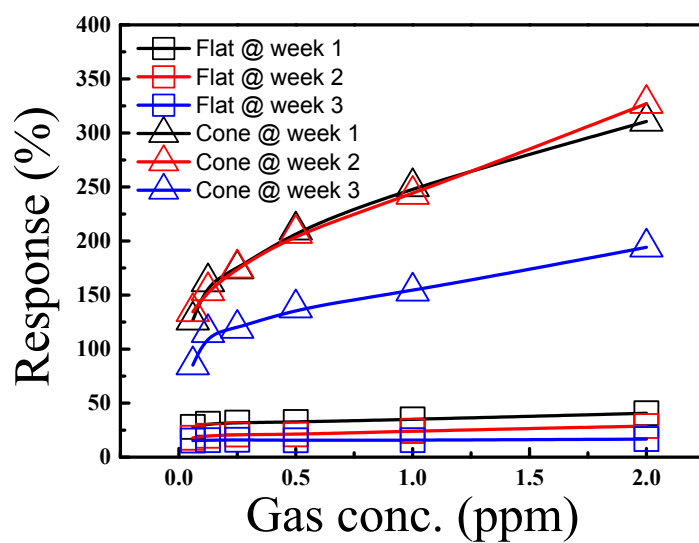

**Figure S9** A plot of response over 3 weeks as a dependence of NO concentration gradient for both F-MoS<sub>2</sub> GS and CS-MoS<sub>2</sub> GS.

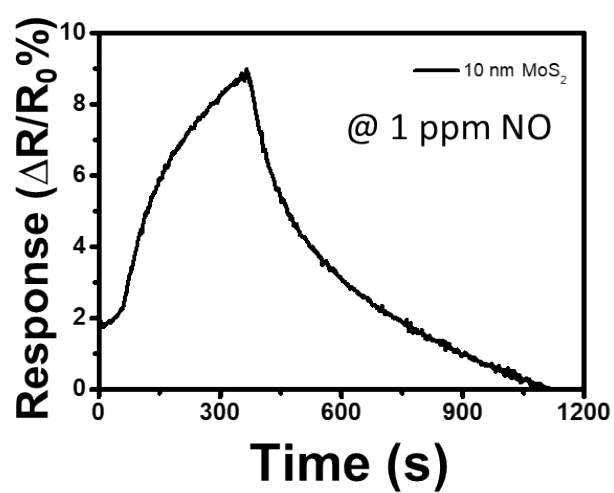

**Figure S10** 1ppm NO gas sensing measurements of C-MoS<sub>2</sub> GS with layered thickness of 10 nm at operating temperatures

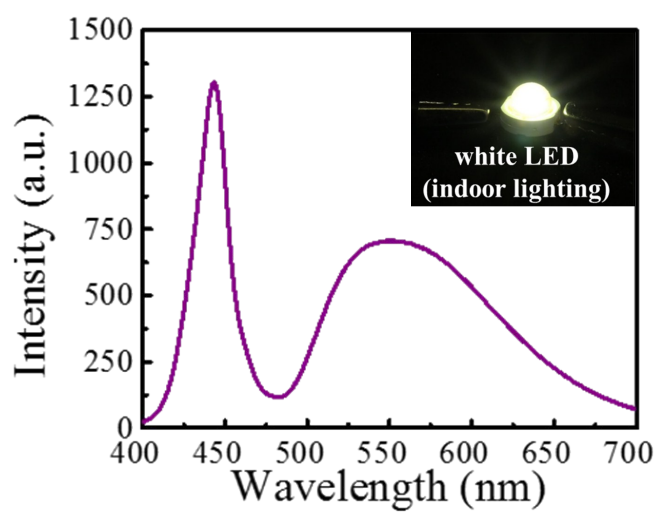

**Figure S11** The radiant flux of the white-light LED. Inset shows an image of a white-light LED for the indoor lighting.
